# Supplementary material
Source: Springer Nature journal article supplement (https://www.springermedizin.de/resource/supplementary/12935_2007_184_MOESM3_ESM.pdf/9541300)

**A**

0h      24h      48h      48h Put

**p16**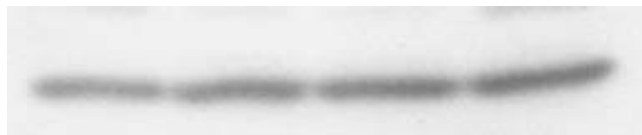

100      103      105      109 (%)

**p21**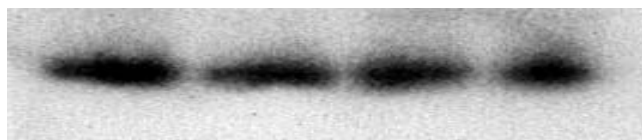

100      98      97      92

**p27**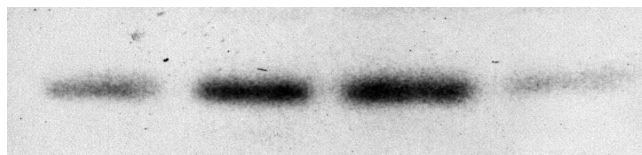

100      235      268      88

**cytochrome c**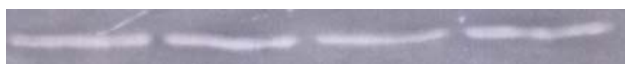**B****Y79****Jurkat****pRb**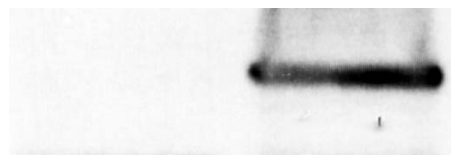

0h      24h      48h      48h Put

**pp107** →**p107** →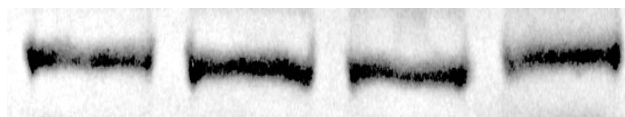← **pp107**← **p107****p130**

3 →

2 →

1 →

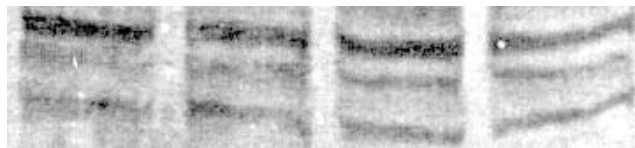

← 3

← 2

← 1

Supplement: MOESM3 [file 9541300]
